# Supplementary material for: Predicting habitat suitability for Townsend's big‐eared bats across California in relation to climate change
Source: PubMed Central journal article supplement (PMC9755818; doi:10.1002/ece3.9641), 2022-12-15
Supplement: ECE3-12-e9641-s001.pdf [file ECE3-12-e9641-s001.pdf]

Table S1.1

| Data Level   | Number of records | Description                                        |
|--------------|-------------------|----------------------------------------------------|
| Combined     | 241               | All Occurrence Records                             |
| Transition   | 94                | Non-breeding, non-hibernating roosts               |
| Hibernacula  | 81                | Winter roosts                                      |
| Maternity    | 67                | Summer roosts with >5 females roosting             |
| Ecoregion 1  | 12                | Coast Range                                        |
| Ecoregion 4  | 21                | Cascades                                           |
| Ecoregion 5  | 23                | Sierra Nevada                                      |
| Ecoregion 6  | 37                | Central California Foothills and Coastal Mountains |
| Ecoregion 7  | 0                 | Central California Valley                          |
| Ecoregion 8  | 20                | Southern California Mountains                      |
| Ecoregion 9  | 8                 | Eastern Cascade Slopes and Foothills               |
| Ecoregion 13 | 37                | Central Basin and Range                            |
| Ecoregion 14 | 39                | Mojave Basin and Range                             |
| Ecoregion 78 | 20                | Klamath Mountains                                  |
| Ecoregion 81 | 7                 | Sonoran Basin and Range                            |
| Ecoregion 85 | 11                | Southern California/Northern Baja Coast            |

Table S1.1: Description of roost data included in this study. Data Level corresponds to state-wide and ecoregion-specific data, with the number of roosts found in each category. Description indicates what type of state-wide roosts are included, and the name of the level III ecoregions in California
