# Supplementary material for: Predicting habitat suitability for Townsend's big‐eared bats across California in relation to climate change
Source: PubMed Central journal article supplement (PMC9755818; doi:10.1002/ece3.9641), 2022-12-15
Supplement: ECE3-12-e9641-s002.pdf [file ECE3-12-e9641-s002.pdf]

Figure S2.1. Response plot for combined model

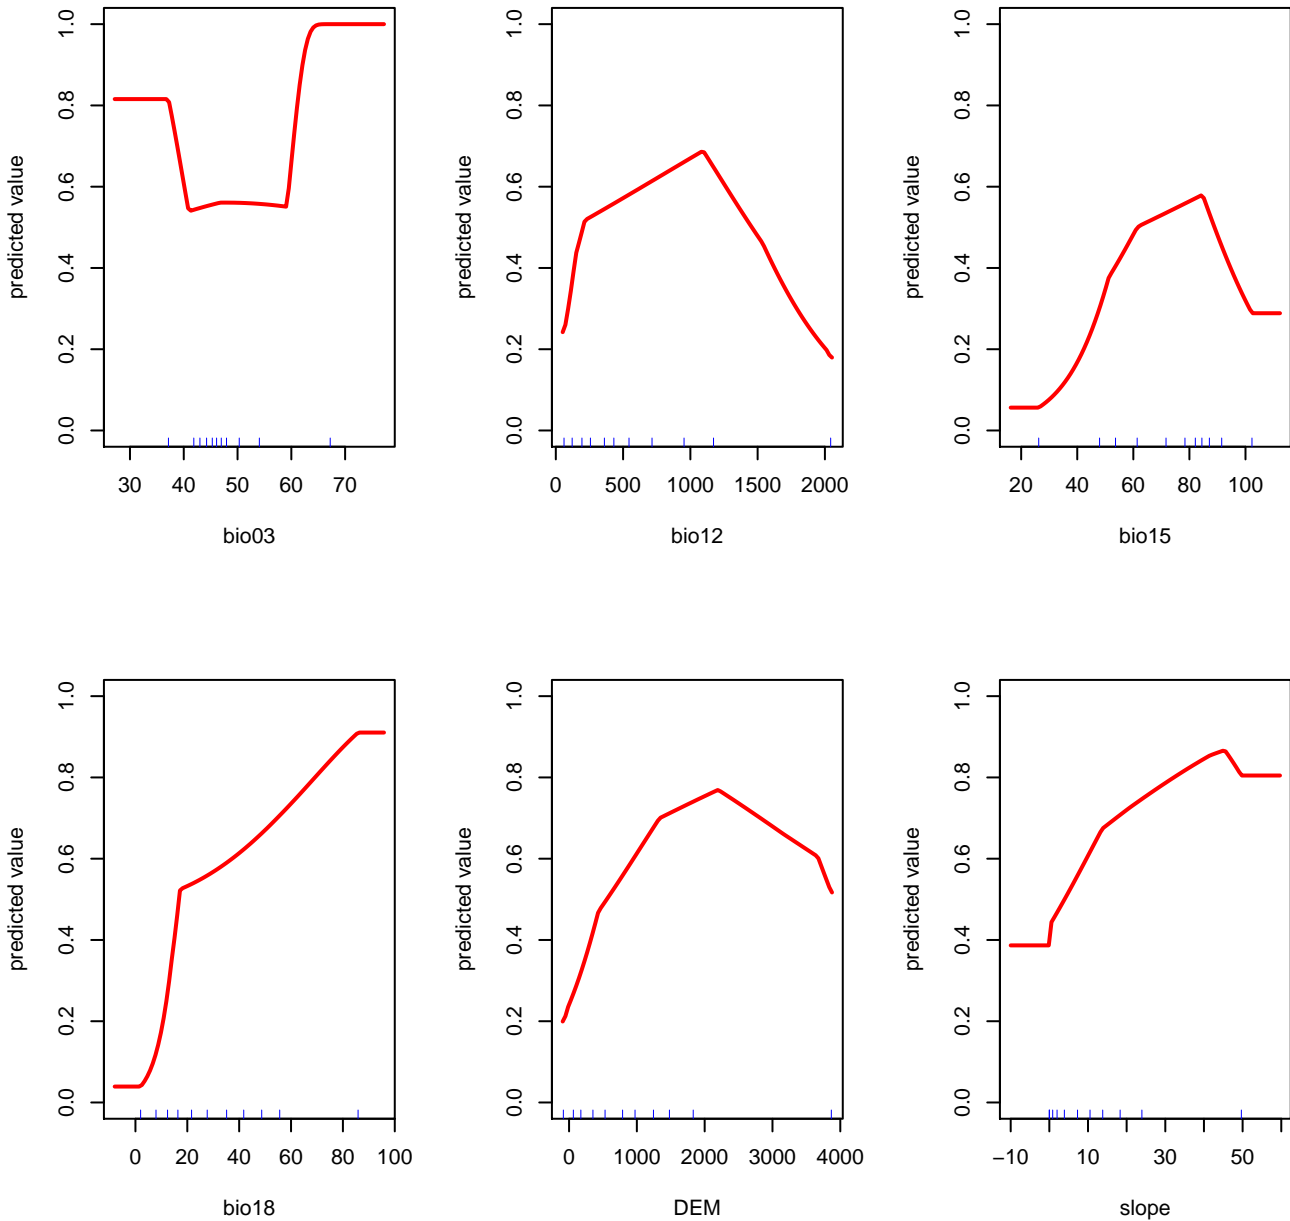

Figure S2.2. Response plots for hibernacula model

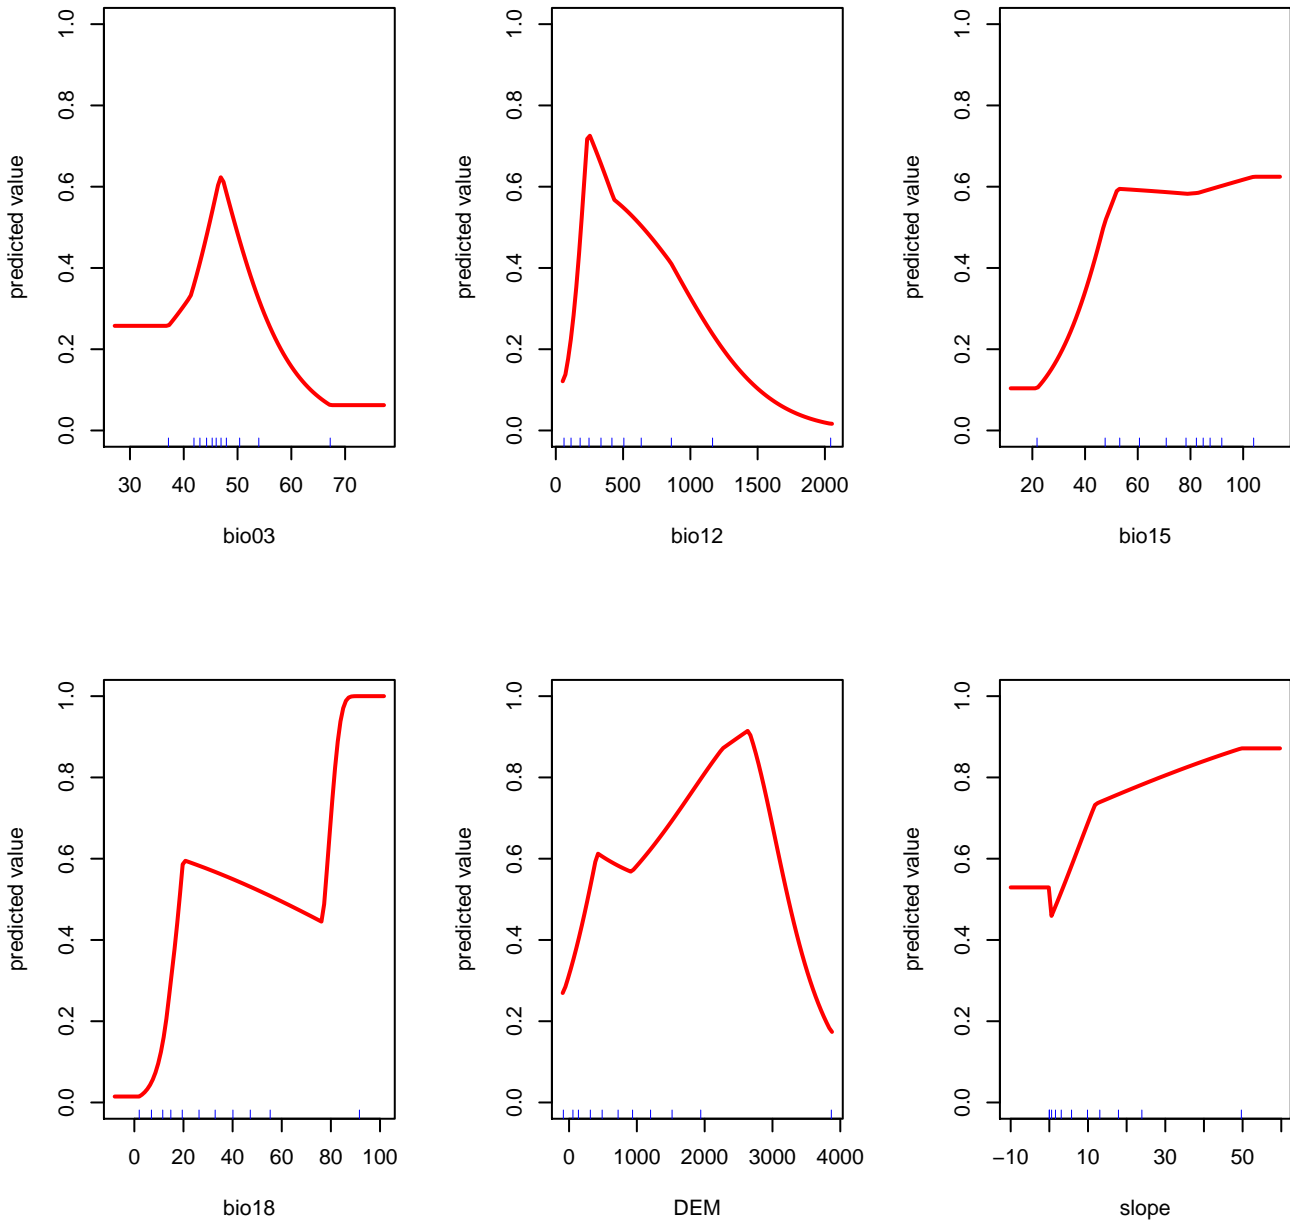

Table S2.3. Response plots for maternity models

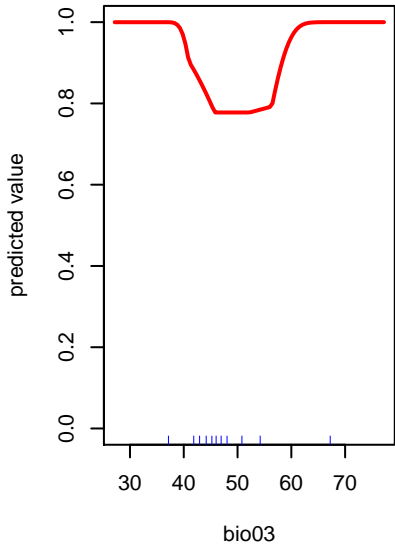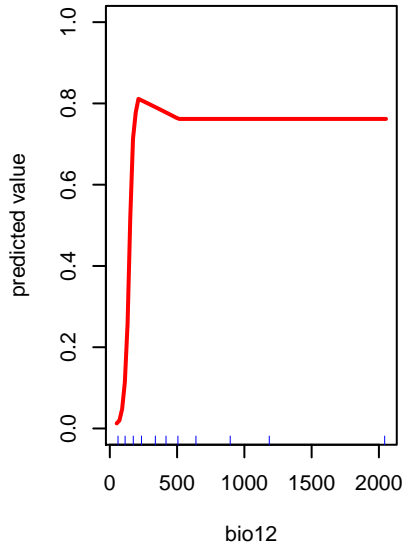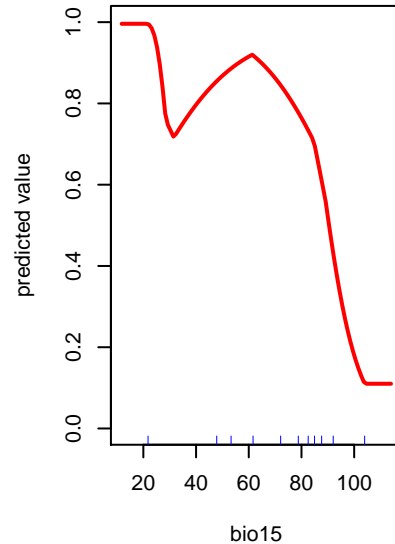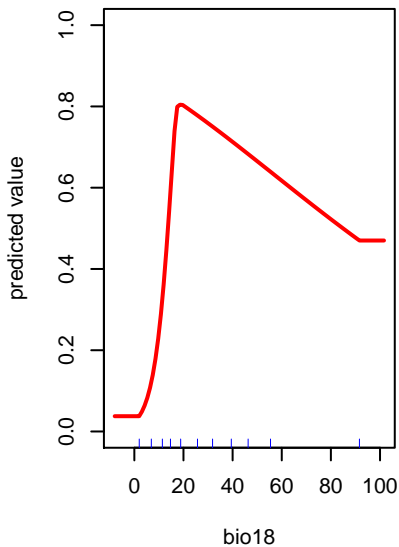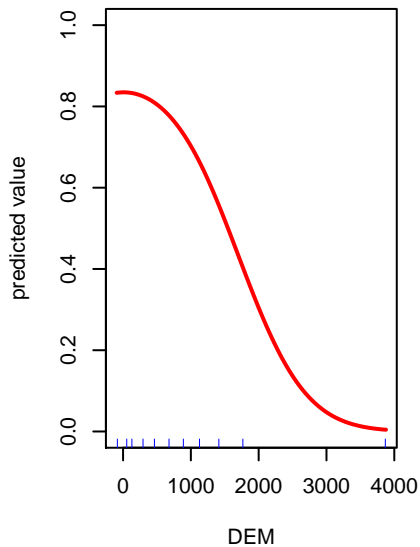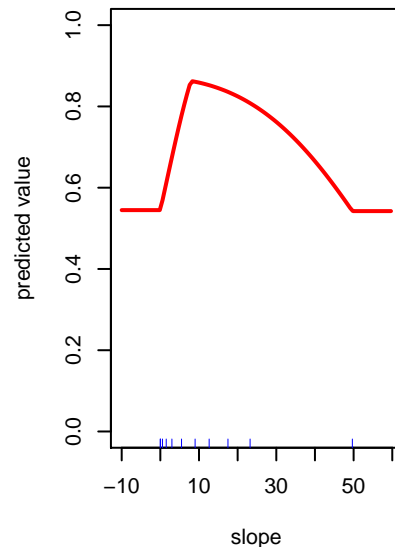

Vaa| ^ À Ü G È Ë Ü ^ • [ ] } ^ Á [ [ • Á | Á æ • ã ] Á [ à ^

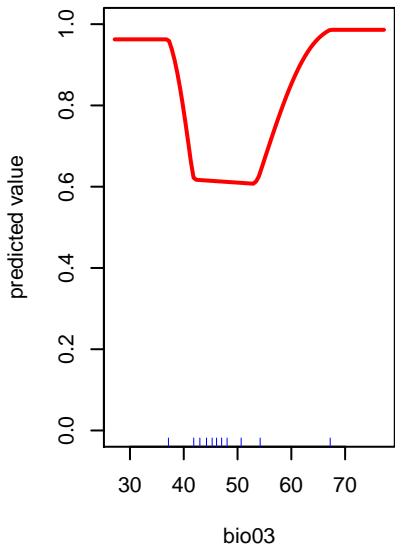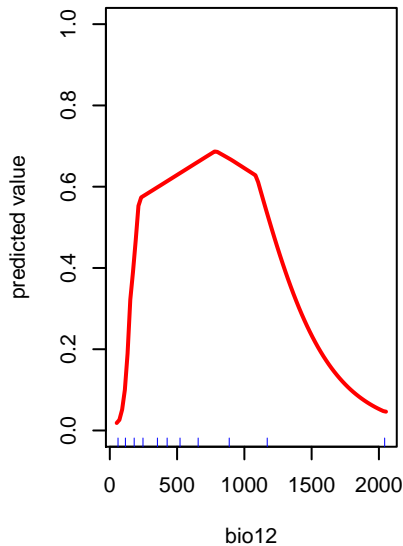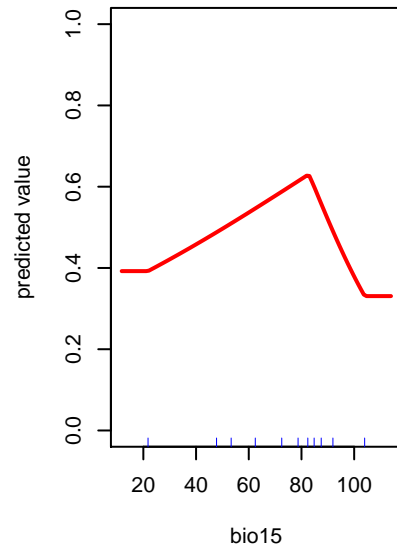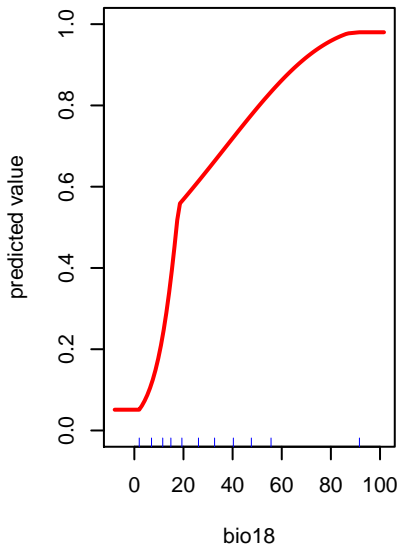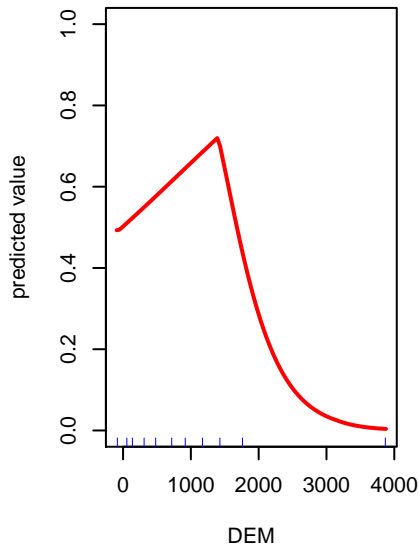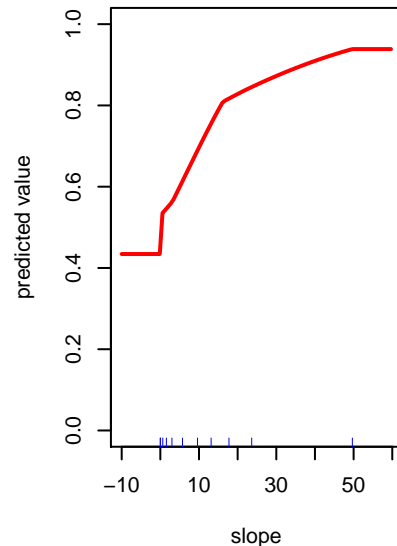

Figure S2.5. Response plot for ecoregion 1

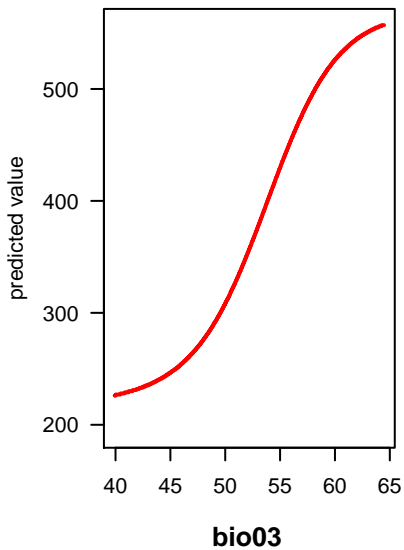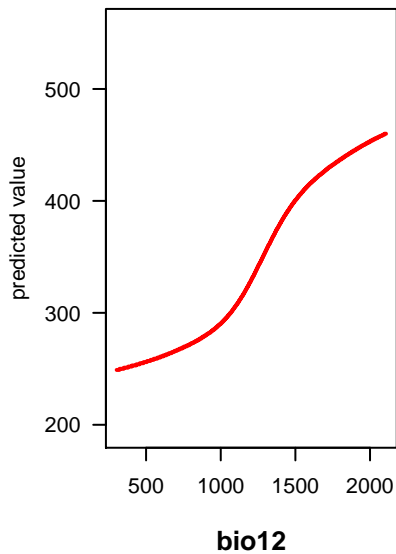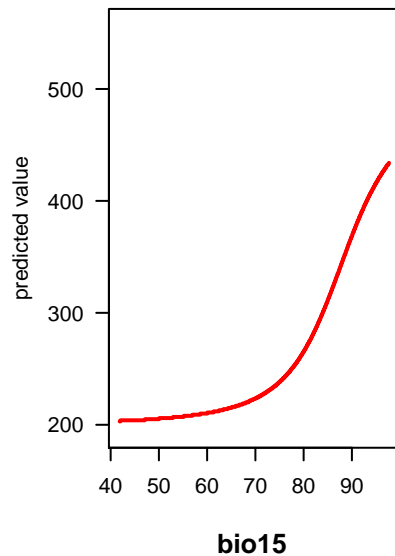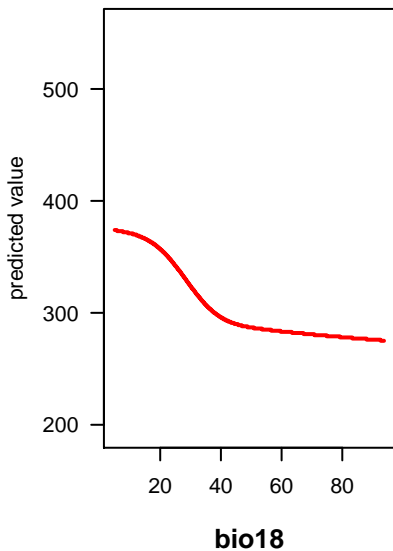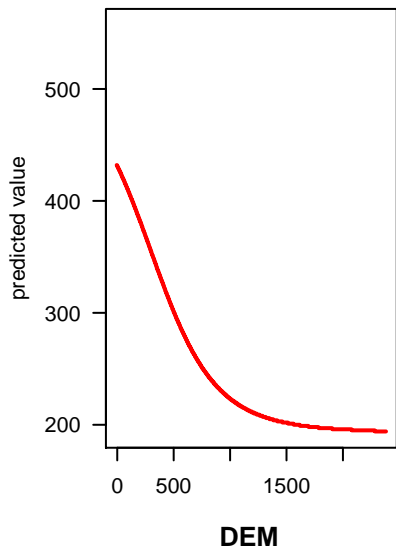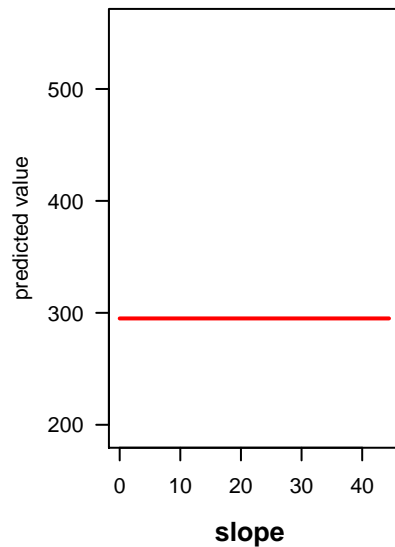

Figure S2.6. Response plots for ecoregion 4

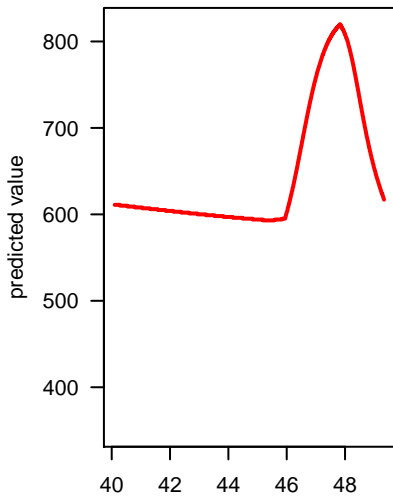

**bio03**

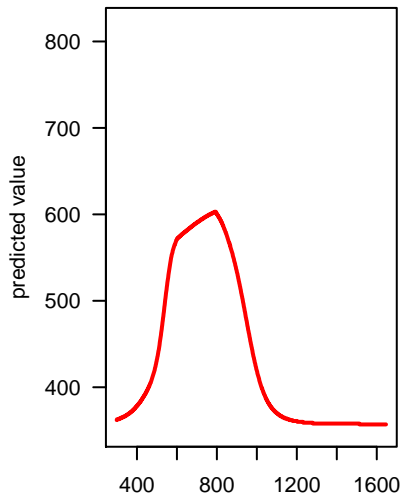

**bio12**

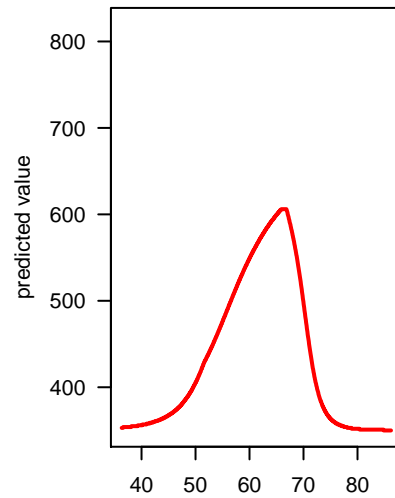

**bio15**

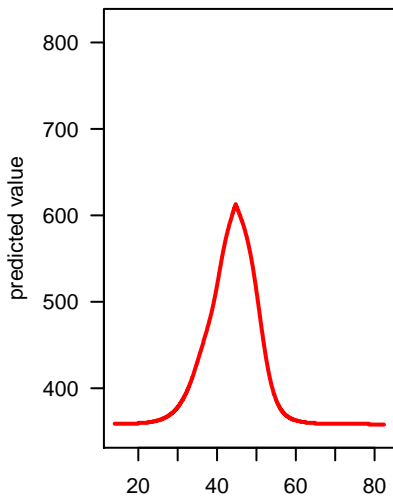

**bio18**

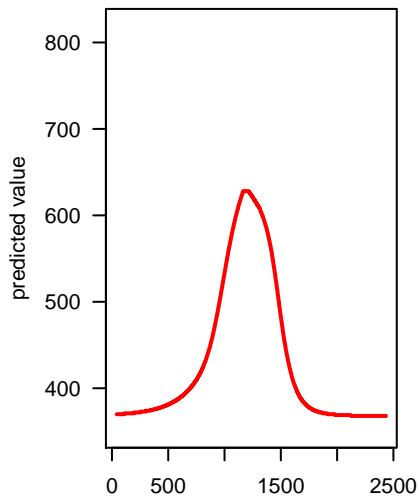

**DEM**

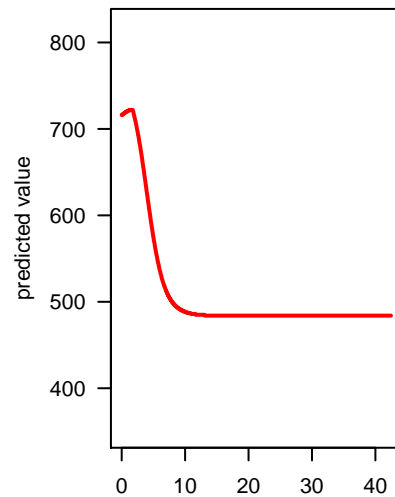

**slope**

Table S2.7 Response plots for ecoregion 5

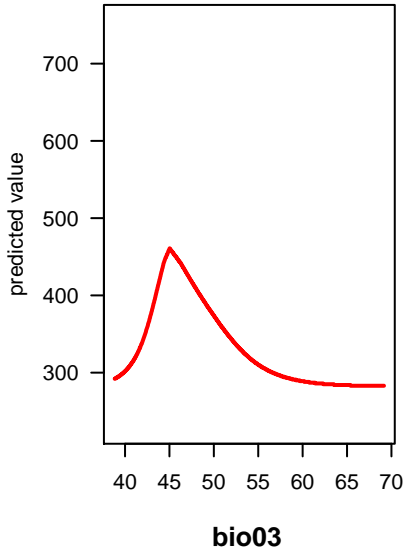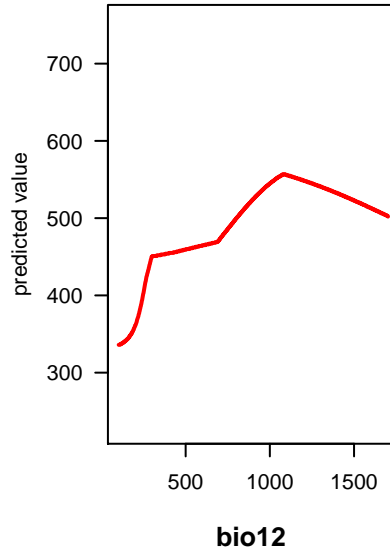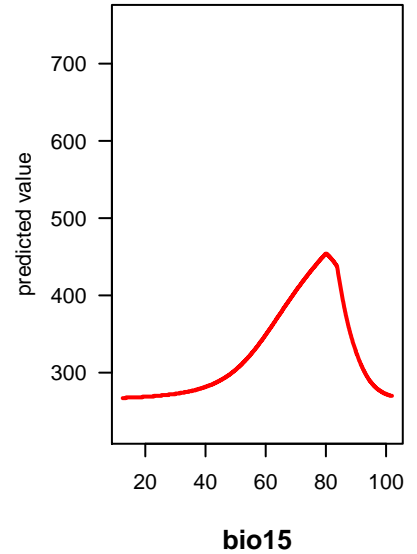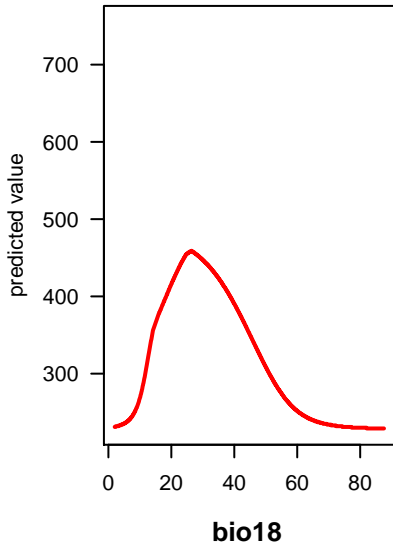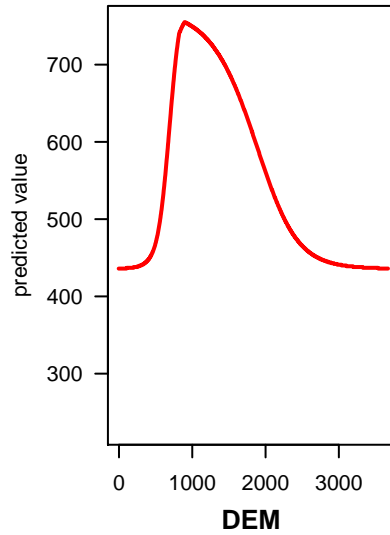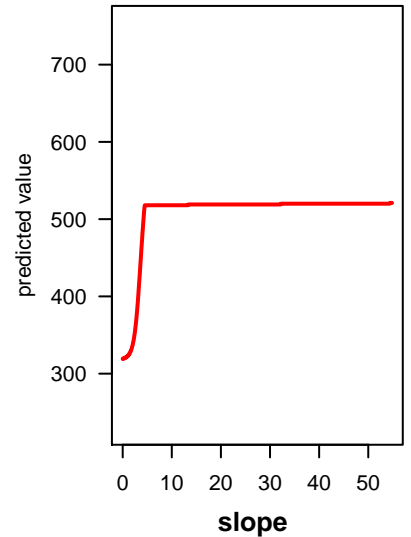

Figure S2.8. Response plots for ecoregion 6

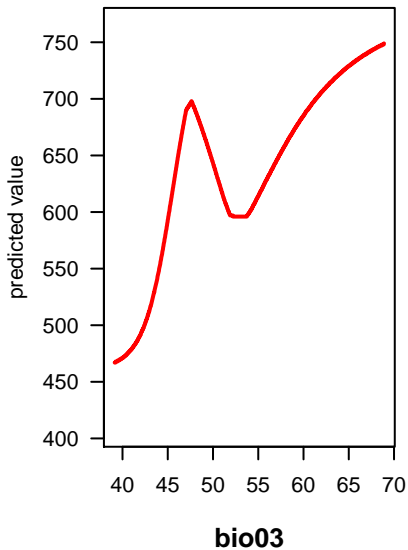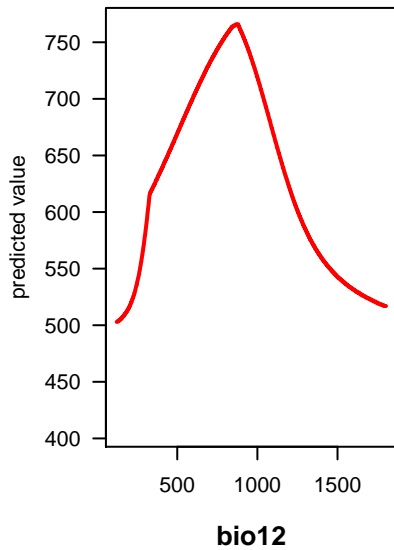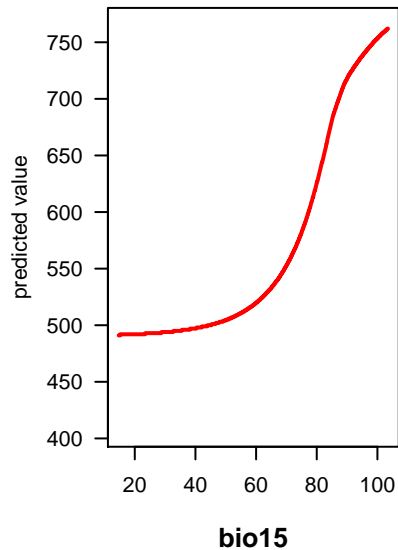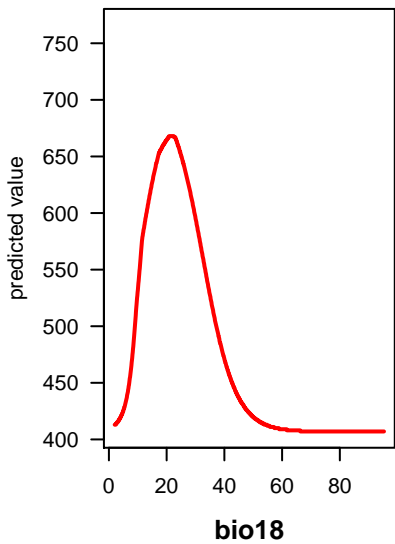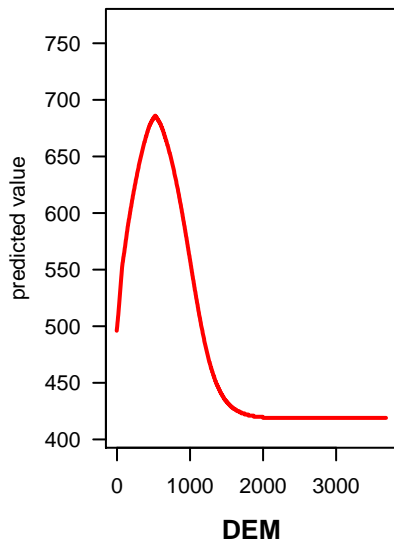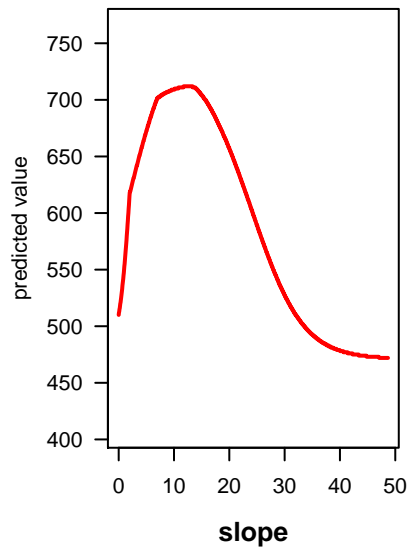



Figure S2.9. Response plots for ecoregion 8

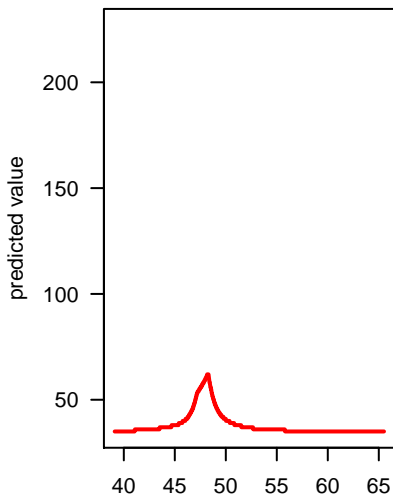

**bio03**

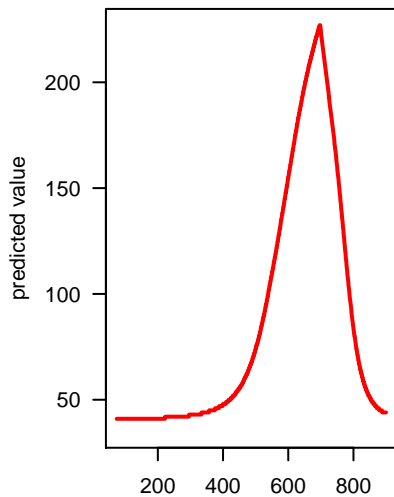

**bio12**

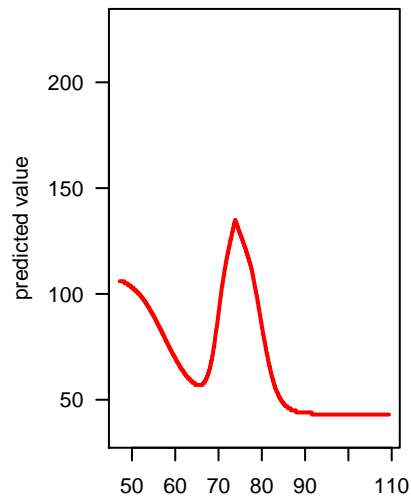

**bio15**

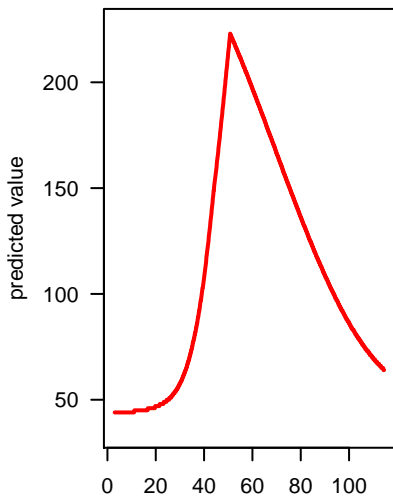

**bio18**

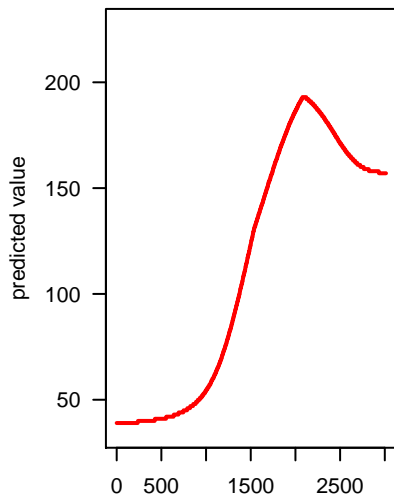

**DEM**

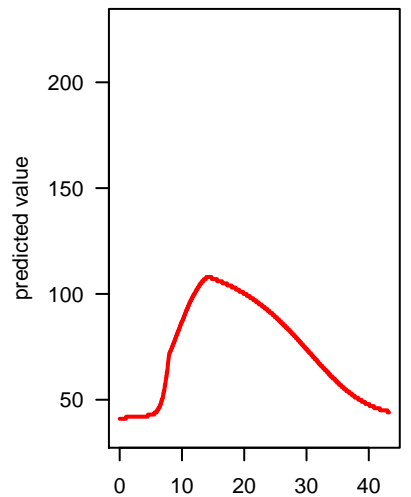

**slope**

Figure S2.10. Response plots for ecoregion 13

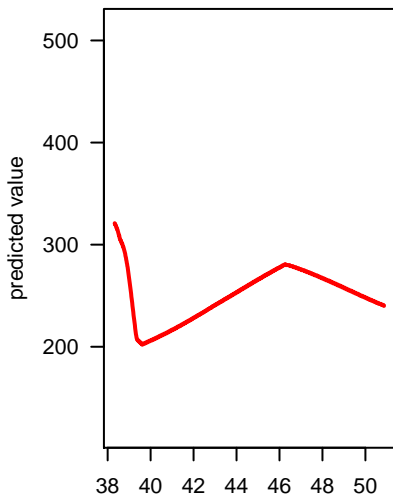

**bio03**

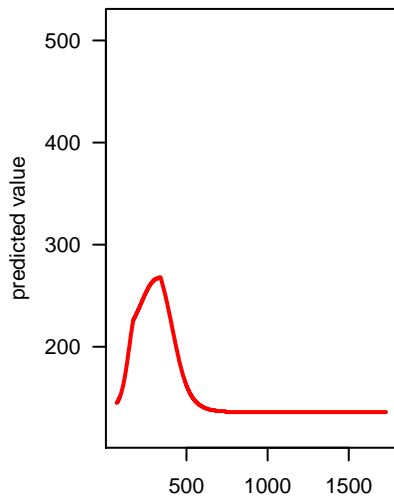

**bio12**

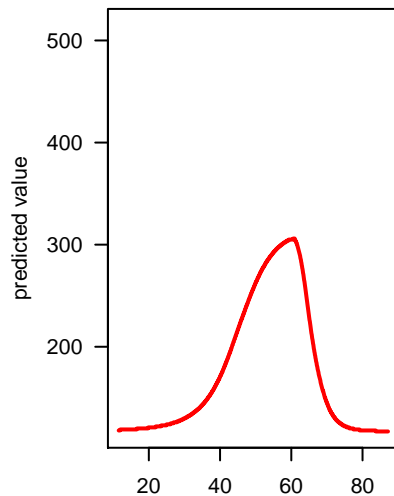

**bio15**

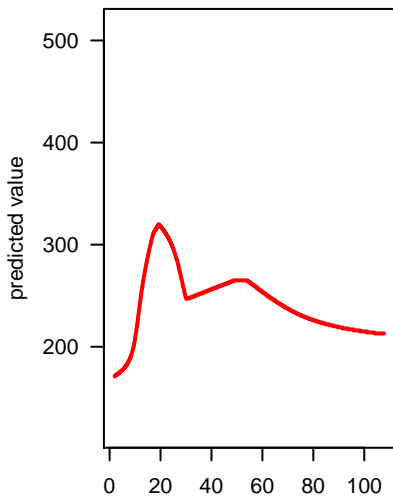

**bio18**

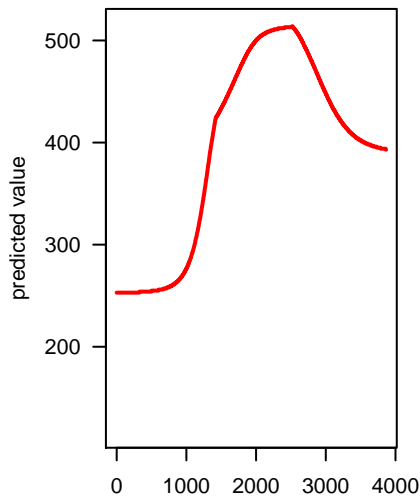

**DEM**

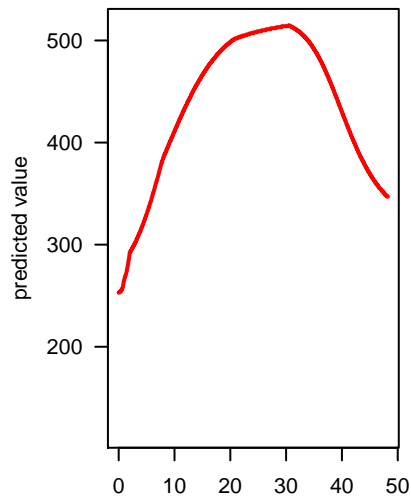

**slope**

Figure S2.11. Response plots for ecoregion 14

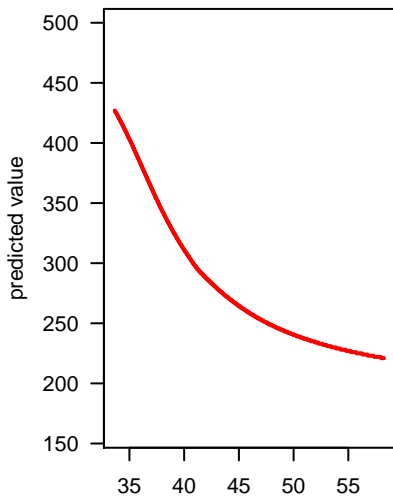

**bio03**

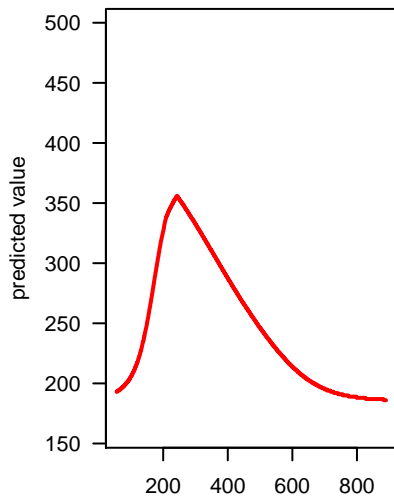

**bio12**

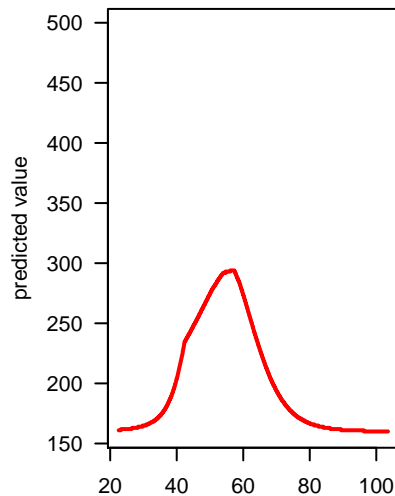

**bio15**

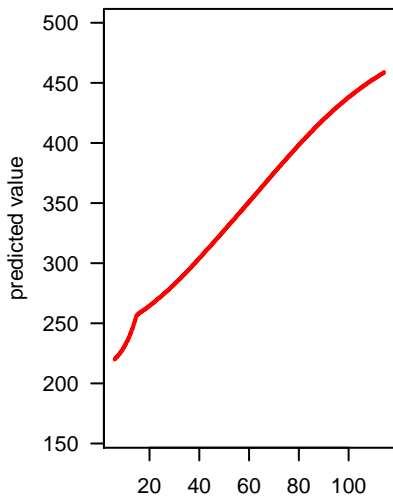

**bio18**

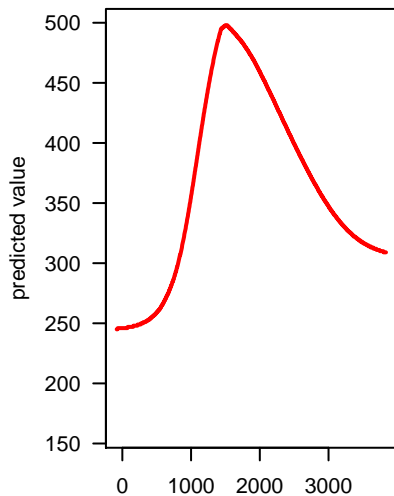

**DEM**

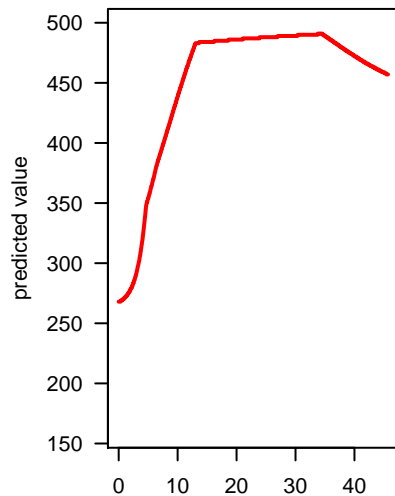

**slope**

Figure S2.12. Response plots for ecoregion 78

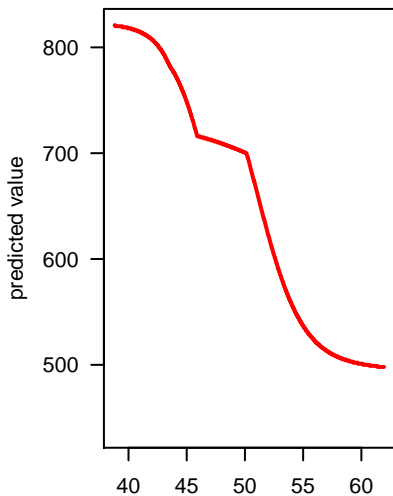

**bio03**

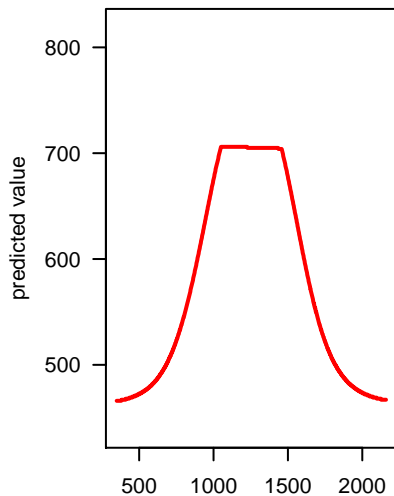

**bio12**

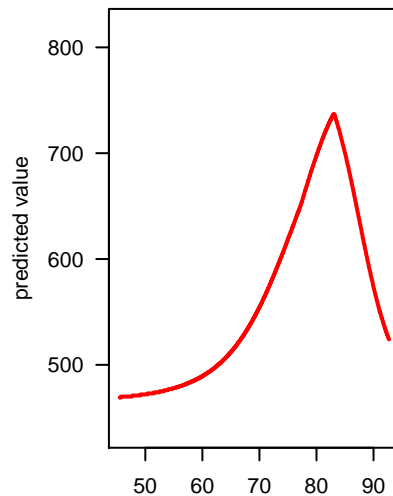

**bio15**

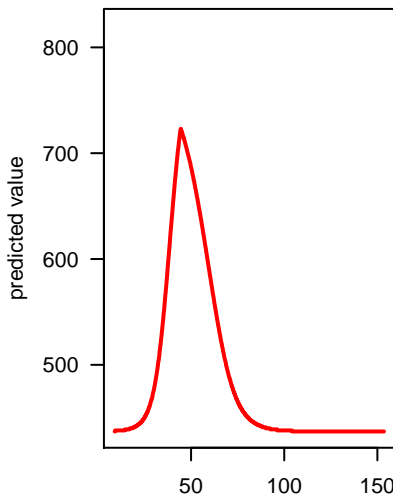

**bio18**

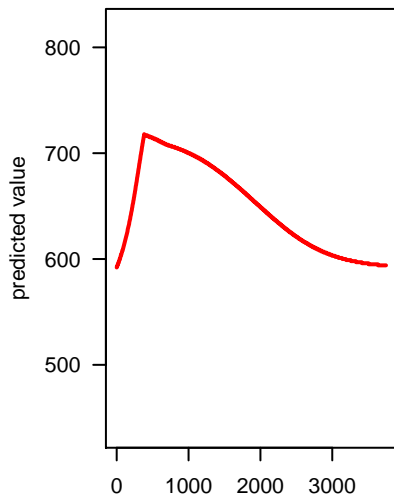

**DEM**

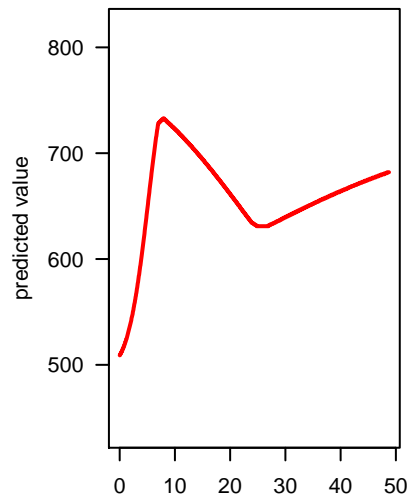

**slope**

Figure S2.13. Response plots for ecoregion 85

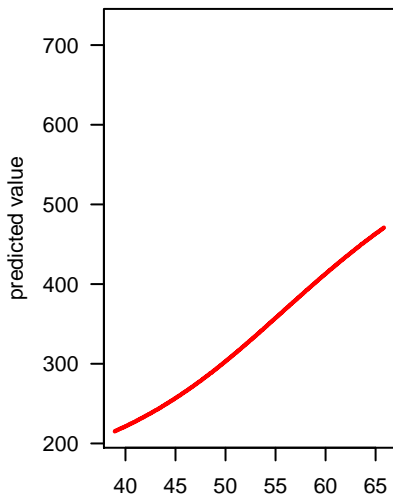

**bio03**

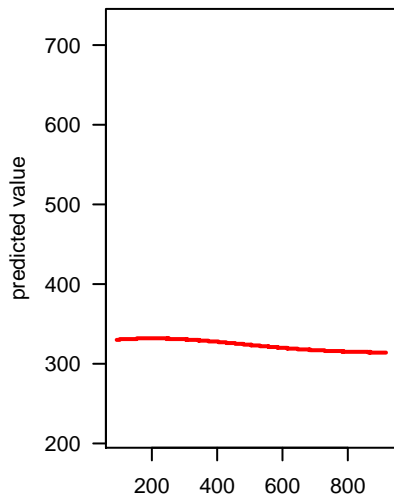

**bio12**

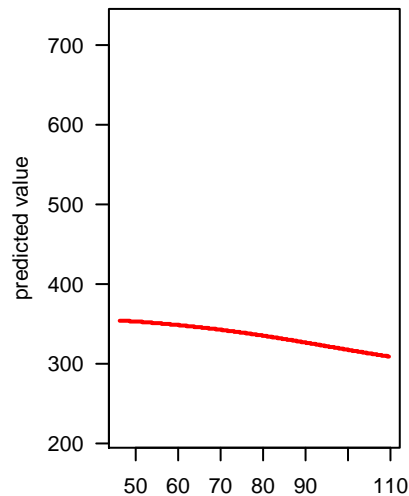

**bio15**

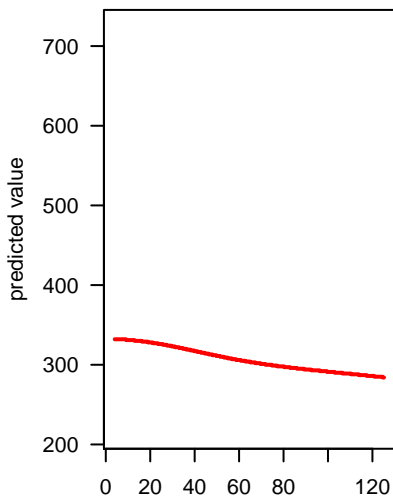

**bio18**

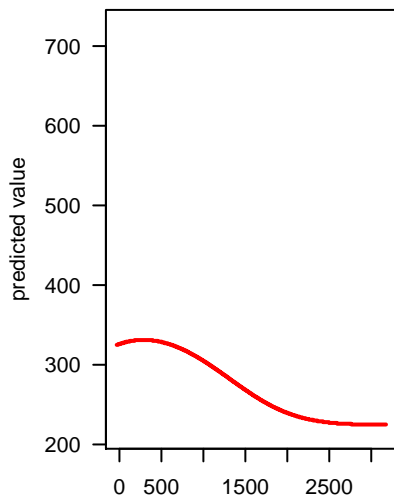

**DEM**

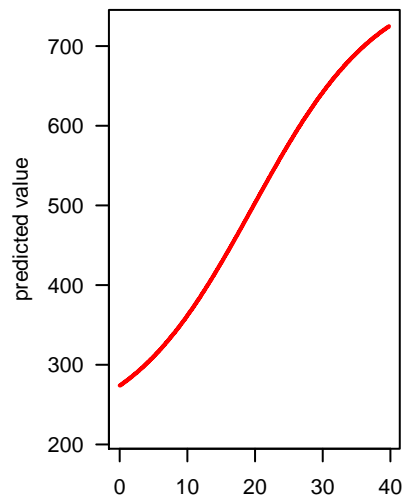

**slope**
