# Supplementary material for: Predicting habitat suitability for Townsend's big‐eared bats across California in relation to climate change
Source: PubMed Central journal article supplement (PMC9755818; doi:10.1002/ece3.9641), 2022-12-15
Supplement: ECE3-12-e9641-s003.pdf [file ECE3-12-e9641-s003.pdf]

Table S1.3

|              | Bio03            | Bio12            | Bio15           | Bio18            | DEM              | Slope            |
|--------------|------------------|------------------|-----------------|------------------|------------------|------------------|
| Combined     | 2.5424           | 31.33126         | 3.92612         | <b>36.1294</b>   | 7.1108           | 18.96            |
| Transition   | 2.9              | <b>32.41404</b>  | 2.3266          | <b>31.23004</b>  | 18.63114         | 13.68822         |
| Maternity    | 5.44544          | 26.5663          | 5.24438         | <b>37.00218</b>  | 17.89218         | 7.8495           |
| Hibernacula  | 6.3935           | 21.87648         | 3.93754         | 14.21812         | <b>33.16678</b>  | 20.40758         |
| Ecoregion 1  | 0.9477221        | 1.02             | 0.95            | <b>1.0829572</b> | 0.99             | 1.01             |
| Ecoregion 4  | <b>1.0209974</b> | 0.9800609        | 0.9911634       | <b>1.0046279</b> | 0.9990951        | <b>1.0043745</b> |
| Ecoregion 5  | 1.0294416        | 0.9592813        | 1.0163638       | <b>1.0740889</b> | 0.9367018        | 0.9882539        |
| Ecoregion 6  | 0.9836468        | <b>1.0191214</b> | 1.0132197       | 0.9971085        | 0.9681059        | <b>1.0195384</b> |
| Ecoregion 8  | <b>1.0084914</b> | 0.9977668        | 0.9953172       | 0.9971383        | 0.9996223        | 1.0017008        |
| Ecoregion 13 | 1.0104757        | 0.9038749        | 1.0089537       | 1.0182785        | <b>1.0493431</b> | 1.0132868        |
| Ecoregion 14 | 1.0384014        | 0.8988841        | 1.0306774       | <b>1.0594201</b> | 0.9636364        | 1.0149783        |
| Ecoregion 78 | 1.02604          | 1.002102         | <b>1.039116</b> | 0.89781          | 1.031864         | 1.007756         |
| Ecoregion 85 | 0.8834957        | 1.1782754        | 1.0110559       | 0.8917618        | <b>1.1866096</b> | 0.8832556        |

Table S1.3. Contribution of each environmental predictor to the final model. For statewide models (Combined, Hibernacula, Maternity, and Transition), values indicate percent contribution to the model. For ecoregion-specific ensemble of small models output, values indicate proportional contribution of the variable in the final ensemble model. Value >1 indicates the focal variable has a higher contribution than average. Bold values indicate highest contributing variables.
