# Supplementary material for: Predicting habitat suitability for Townsend's big‐eared bats across California in relation to climate change
Source: PubMed Central journal article supplement (PMC9755818; doi:10.1002/ece3.9641), 2022-12-15
Supplement: ECE3-12-e9641-s004.pdf [file ECE3-12-e9641-s004.pdf]

Table S1.2

| Geographic Extent | AUC  | TSS  | Threshold | Null AUC | 95% CI | p-value  |
|-------------------|------|------|-----------|----------|--------|----------|
| All Occurrences   | 0.81 | 0.51 | 0.44      | -        | -      | -        |
| Intermediate      | 0.8  | 0.47 | 0.45      | -        | -      | -        |
| Hibernacula       | 0.86 | 0.57 | 0.43      | -        | -      | -        |
| Maternity         | 0.78 | 0.43 | 0.4       | -        | -      | -        |
| Ecoregion 1       | 0.92 | 0.88 | 0.54      | 0.67     | 0.90   | 1.31E-08 |
| Ecoregion 4       | 0.98 | 0.91 | 0.38      | 0.77     | 0.97   | 2.97E-11 |
| Ecoregion 5       | 0.90 | 0.80 | 0.63      | 0.77     | 0.89   | 2.01E-07 |
| Ecoregion 6       | 0.85 | 0.64 | 0.51      | 0.74     | 0.84   | 1.10E-05 |
| Ecoregion 8       | 0.98 | 0.95 | 0.39      | 0.66     | 0.97   | 9.30E-15 |
| Ecoregion 13      | 0.98 | 0.93 | 0.45      | 0.70     | 0.97   | 2.66E-15 |
| Ecoregion 14      | 0.9  | 0.73 | 0.37      | 0.72     | 0.88   | 1.25E-06 |
| Ecoregion 78      | 0.8  | 0.6  | 0.57      | 0.75     | 0.85   | 4.28E-06 |
| Ecoregion 85      | 0.89 | 0.83 | 0.39      | 0.72     | 0.78   | 0.002082 |

Table S1.2: Model performance for each of the models run in our study. AUC = Area under the receiver curve. AUC represents the mean AUC from 5-fold validation for state-wide models and 10-fold for ecoregion-specific models. MaxTSS = maximum True Skill Statistic, Threshold = maximized sum of sensitivity and specificity of the model. This is the threshold set for the creation of binary map for each model. Null AUC = The mean AUC value from 100 null models run with null model testing for our ecoregion-specific models. 95% CI = 95% One-sided 95% confidence interval for t.test comparing null model AUC to model AUC. p-value = p-value from our one-sided t-test, testing the alternative hypothesis true mean is greater than null.
